# Supplementary material for: Seven luminescent metal–organic frameworks constructed from 5-(triazol-1-yl)nicotinic acid: luminescent sensors for CrVI and MnO4− ions in an aqueous medium
Source: Royal Society of Chemistry journal article supplement (doi:10.1039/c8nj01144c), 2018-01-01
Supplement: c8nj01144c1.pdf [file c8nj01144c1.pdf]

## Supporting Information

### Seven luminescent metal-organic frameworks constructed by the 5-(triazol-1-yl) nicotinic acid: Luminescent Sensors for Cr<sup>VI</sup> and MnO<sub>4</sub><sup>-</sup> Ions in an Aqueous Medium

Yang-Tian Yan,<sup>‡</sup> Feng Cao,<sup>‡</sup> Wen-Yan Zhang,<sup>\*</sup> Si-Si Zhang, Fang Zhang, Yao-Yu Wang<sup>\*</sup>

Key Laboratory of Synthetic and Natural Functional Molecule Chemistry of the Ministry of Education, Shaanxi Key Laboratory of Physico-Inorganic Chemistry, College of Chemistry & Materials Science, Northwest University, Xi'an 710127, P. R. China

**Table S1** Selected bond lengths (Å) and bond angles (°) for **1-7**

---

| Complex 1     |           |               |          |
|---------------|-----------|---------------|----------|
| Cd(1)-O(5)#1  | 2.46(2)   | Cd(2)-O(7)    | 2.44(2)  |
| Cd(1)-O(5)#2  | 2.46(2)   | Cd(2)-O(2)#5  | 2.593(6) |
| Cd(1)-N(4)#3  | 2.317(4)  | Cd(2)-N(1)    | 2.320(6) |
| Cd(1)-N(4)    | 2.317(4)  | O(4)-Cd(2)#6  | 2.624(6) |
| Cd(1)-N(5)    | 2.353(4)  | O(4)-Cd(2A)#6 | 2.629(4) |
| Cd(1)-N(5)#3  | 2.353(4)  | O(8)-Cd(2A)   | 2.353(5) |
| Cd(1)-O(6A)#1 | 2.361(11) | O(3)-Cd(2)#6  | 2.245(6) |
| Cd(1)-O(6A)#2 | 2.361(11) | O(3)-Cd(2A)#6 | 2.239(4) |

---

---

|                      |            |                      |            |
|----------------------|------------|----------------------|------------|
| Cd(2)-O(4)#4         | 2.624(6)   | O(1)-Cd(2)#7         | 2.266(6)   |
| Cd(2)-O(8)           | 2.236(5)   | O(1)-Cd(2A)#7        | 2.289(4)   |
| Cd(2)-O(3)#4         | 2.245(6)   | O(5)-Cd(1)#8         | 2.46(2)    |
| Cd(2)-O(1)#5         | 2.266(6)   | O(2)-Cd(2)#7         | 2.593(6)   |
| O(2)-Cd(2A)#7        | 2.593(4)   | Cd(2A)-O(4)#4        | 2.629(4)   |
| O(7A)-Cd(2A)         | 2.639(9)   | Cd(2A)-O(3)#4        | 2.239(4)   |
| O(5A)-Cd(2A)         | 2.397(13)  | Cd(2A)-O(1)#5        | 2.289(4)   |
| O(6A)-Cd(1)#8        | 2.361(11)  | Cd(2A)-O(2)#5        | 2.593(5)   |
| O(5)#1-Cd(1)-O(5)#2  | 180.0(8)   | N(4)-Cd(1)-O(5)#2    | 77.4(5)    |
| N(4)#3-Cd(1)-O(5)#2  | 102.6(5)   | N(4)-Cd(1)-O(5)#1    | 102.6(5)   |
| O(1)#5-Cd(2)-O(2)#5  | 53.08(15)  | O(1)#5-Cd(2)-N(1)    | 135.7(2)   |
| O(3)#4-Cd(2)-O(1)#5  | 84.8(2)    | O(1)#5-Cd(2)-O(7)    | 112.3(7)   |
| O(3)#4-Cd(2)-O(4)#4  | 52.75(15)  | O(3)#4-Cd(2)-O(7)    | 81.2(9)    |
| O(8)-Cd(2)-N(1)      | 84.95(18)  | O(3)#4-Cd(2)-O(2)#5  | 135.8(2)   |
| O(8)-Cd(2)-O(2)#5    | 90.7(2)    | O(3)#4-Cd(2)-N(1)    | 138.3(3)   |
| O(8)-Cd(2)-O(7)      | 154.8(7)   | O(1)#5-Cd(2)-O(4)#4  | 135.5(2)   |
| O(1)#5-Cd(2A)-O(8)   | 89.09(18)  | O(1)#5-Cd(2A)-N(1)   | 135.53(16) |
| O(1)#5-Cd(2A)-O(4)#4 | 133.87(16) | O(1)#5-Cd(2A)-O(2)#5 | 52.88(12)  |
| O(3)#4-Cd(2A)-O(7A)  | 80.3(2)    | O(3)#4-Cd(2A)-O(5A)  | 89.7(3)    |
| O(3)#4-Cd(2A)-O(4)#4 | 52.72(12)  | O(3)#4-Cd(2A)-N(1)   | 140.03(17) |
| O(8)-Cd(2A)-O(5A)    | 159.6(3)   | O(3)#4-Cd(2A)-O(2)#5 | 136.14(16) |
| O(8)-Cd(2A)-O(7A)    | 147.6(2)   | O(3)#4-Cd(2A)-O(1)#5 | 84.42(15)  |
| O(8)-Cd(2A)-O(2)#5   | 88.15(18)  | O(3)#4-Cd(2A)-O(8)   | 102.23(18) |
| O(7)-Cd(2)-O(2)#5    | 101.0(9)   | N(1)-Cd(2)-O(7)      | 74.6(8)    |

---

|                      |            |                     |           |
|----------------------|------------|---------------------|-----------|
| O(2)#5-Cd(2)-O(4)#4  | 171.3(2)   | N(1)-Cd(2)-O(2)#5   | 82.71(18) |
| N(1)-Cd(2)-O(4)#4    | 88.68(19)  | O(4)#4-Cd(2A)-O(7A) | 70.76(18) |
| O(7)-Cd(2)-O(4)#4    | 77.6(8)    | O(8)-Cd(2A)-O(4)#4  | 84.97(16) |
| N(1)-Cd(2A)-O(8)     | 82.80(15)  | N(1)-Cd(2A)-O(2)#5  | 83.11(13) |
| N(1)-Cd(2A)-O(4)#4   | 88.99(13)  | N(1)-Cd(2A)-O(7A)   | 75.77(18) |
| O(2)#5-Cd(2A)-O(7A)  | 112.7(2)   | N(1)-Cd(2A)-O(5A)   | 98.7(3)   |
| O(2)#5-Cd(2A)-O(4)#4 | 170.12(17) | O(5A)-Cd(2A)-O(4)#4 | 115.4(3)  |
| O(1)#5-Cd(2A)-O(5A)  | 75.5(2)    | O(5A)-Cd(2A)-O(2)#5 | 71.9(3)   |
| O(1)#5-Cd(2A)-O(7A)  | 123.2(2)   | O(5A)-Cd(2A)-O(7A)  | 50.3(3)   |

Symmetrical codes: #1 x, y-1, z ; #2 -x+1, -y+2, -z+2 ; #3 -x+1, -y+1, -z+2 ; #4 x, y+1,

---

#### Complex 2

|                     |            |                     |            |
|---------------------|------------|---------------------|------------|
| Cd(1)-O(1)#1        | 2.2952(15) | N(4)-Cd(1)#4        | 2.3367(17) |
| Cd(1)-O(1)          | 2.2952(15) | Cd(1)-O(3)          | 2.2885(15) |
| Cd(1)-N(4)#2        | 2.3367(17) | Cd(1)-O(3)#1        | 2.2885(15) |
| Cd(1)-N(4)#3        | 2.3367(17) | O(3)#1-Cd(1)-O(1)#1 | 87.69(6)   |
| O(1)#1-Cd(1)-O(1)   | 180.0      | O(3)#1-Cd(1)-N(4)#3 | 80.72(6)   |
| O(1)-Cd(1)-N(4)#3   | 84.30(6)   | O(3)-Cd(1)-N(4)#3   | 99.28(6)   |
| O(1)#1-Cd(1)-N(4)#2 | 84.30(6)   | O(3)-Cd(1)-N(4)#2   | 80.72(6)   |
| O(1)-Cd(1)-N(4)#2   | 95.70(6)   | O(3)#1-Cd(1)-N(4)#2 | 99.28(6)   |
| O(1)#1-Cd(1)-N(4)#3 | 95.70(6)   | O(3)#1-Cd(1)-O(3)   | 180.0      |
| N(4)#2-Cd(1)-N(4)#3 | 180.00(4)  | O(3)-Cd(1)-O(1)#1   | 92.31(6)   |
| O(3)-Cd(1)-O(1)     | 87.69(6)   | O(3)#1-Cd(1)-O(1)   | 92.31(6)   |

z+1 ; #5 x+1, y, z ; #6 x, y-1, z-1 ; #7 x-1, y, z ; #8 x, y+1, z.

Symmetrical codes: #1 -x, -y, -z; #2 -x+1, y-1/2, -z+1/2; #3 x-1, -y+1/2, z-1/2; #4 -x+1, y+1/2, -z+1/2.

---

**Complex 3**

---

|                   |           |                   |          |
|-------------------|-----------|-------------------|----------|
| N(4)-Pb(1)#1      | 2.585(9)  | O(2)-Pb(1)-O(7)   | 154.4(3) |
| O(2)-Pb(1)        | 2.740(9)  | O(1)-Pb(1)-N(4)#2 | 74.9(3)  |
| O(1)-Pb(1)        | 2.388(8)  | O(1)-Pb(1)-O(2)   | 50.1(3)  |
| Pb(1)-N(4)#2      | 2.585(9)  | O(1)-Pb(1)-O(3)   | 80.6(3)  |
| Pb(1)-O(3)        | 2.560(9)  | O(1)-Pb(1)-O(7)   | 131.0(3) |
| Pb(1)-O(7)        | 2.953(10) | O(3)-Pb(1)-N(4)#2 | 72.8(3)  |
| N(4)#2-Pb(1)-O(2) | 122.6(3)  | O(3)-Pb(1)-O(2)   | 82.6(3)  |
| N(4)#2-Pb(1)-O(7) | 73.4(3)   | O(3)-Pb(1)-O(7)   | 122.8(3) |

---

Symmetrical codes: #1 x+1, y, z+1; #2 x-1, y, z-1.

---

**Complex 4**

---

|                   |           |                   |            |
|-------------------|-----------|-------------------|------------|
| Pb(1)-O(4)        | 2.504(4)  | O(4)-Pb(1)-O(5)   | 120.22(14) |
| Pb(1)-O(1)        | 2.636(4)  | O(1)-Pb(1)-N(4)#1 | 75.68(17)  |
| Pb(1)-O(3)        | 2.541(4)  | O(3)-Pb(1)-O(1)   | 130.30(15) |
| Pb(1)-N(4)#1      | 2.689(5)  | O(3)-Pb(1)-N(4)#1 | 126.53(16) |
| Pb(1)-O(5)        | 2.566(4)  | O(3)-Pb(1)-O(5)   | 70.66(14)  |
| O(2)-Pb(1)-O(4)   | 81.19(15) | O(5)-Pb(1)-O(1)   | 77.10(16)  |
| O(2)-Pb(1)-O(1)   | 51.43(14) | O(5)-Pb(1)-N(4)#1 | 152.54(16) |
| O(2)-Pb(1)-O(3)   | 84.61(15) | O(4)-Pb(1)-O(1)   | 126.13(15) |
| O(2)-Pb(1)-N(4)#1 | 83.12(16) | O(4)-Pb(1)-O(3)   | 52.21(13)  |
| O(2)-Pb(1)-O(5)   | 77.14(15) | O(4)-Pb(1)-N(4)#1 | 74.51(15)  |
| Pb(1)-O(2)        | 2.418(4)  |                   |            |

---

Symmetrical codes: #1 x, y-1, z; #2 x, y+1, z.

---

**Complex 5**

---

|                     |            |                     |          |
|---------------------|------------|---------------------|----------|
| Zn(1)-O(3)          | 2.1313(16) | O(3)-Zn(1)-O(4)#1   | 90.18(7) |
| Zn(1)-O(4)          | 2.1455(15) | O(4)-Zn(1)-O(4)#1   | 180.0    |
| Zn(1)-O(4)#1        | 2.1455(15) | N(1)#1-Zn(1)-O(3)   | 90.47(7) |
| Zn(1)-N(1)#1        | 2.0822(17) | N(1)#1-Zn(1)-O(3)#1 | 89.53(7) |
| Zn(1)-N(1)          | 2.0822(17) | N(1)-Zn(1)-O(3)#1   | 90.47(7) |
| O(3)#1-Zn(1)-O(3)   | 180.0      | N(1)-Zn(1)-O(3)     | 89.53(7) |
| O(3)#1-Zn(1)-O(4)#1 | 89.82(7)   | N(1)-Zn(1)-O(4)#1   | 90.43(7) |
| O(3)#1-Zn(1)-O(4)   | 90.18(7)   | N(1)#1-Zn(1)-O(4)   | 90.43(7) |
| N(1)#1-Zn(1)-O(4)#1 | 89.57(7)   | N(1)-Zn(1)-O(4)     | 89.57(7) |
| Zn(1)-O(3)#1        | 2.1313(16) | O(3)-Zn(1)-O(4)     | 89.82(7) |

Symmetrical codes: #1 -x+1, -y+1, -z+1.

#### Complex 6

|              |          |                     |            |
|--------------|----------|---------------------|------------|
| Zn(1)-N(1)   | 2.101(4) | N(1)-Zn(1)-O(3)     | 92.48(16)  |
| Zn(1)-O(3)   | 2.297(4) | O(3)#1-Zn(1)-N(1)   | 121.31(16) |
| Zn(1)-O(3)#1 | 1.989(4) | O(3)#1-Zn(1)-O(3)   | 76.14(16)  |
| Zn(1)-O(8)#2 | 1.990(4) | O(3)#1-Zn(1)-O(8)#2 | 139.66(16) |
| Zn(1)-O(10)  | 2.028(5) | O(3)#1-Zn(1)-O(10)  | 94.4(2)    |
| Zn(2)-O(2)   | 1.952(4) | O(8)#2-Zn(1)-N(1)   | 97.05(16)  |
| Zn(2)-N(4)#3 | 2.022(5) | O(8)#2-Zn(1)-O(3)   | 91.38(16)  |
| Zn(2)-O(6)#4 | 1.943(4) | O(8)#2-Zn(1)-O(10)  | 92.2(2)    |
| Zn(2)-O(9)   | 1.986(5) | O(10)-Zn(1)-N(1)    | 97.6(2)    |
| O(3)-Zn(1)#1 | 1.989(4) | O(10)-Zn(1)-O(3)    | 168.9(2)   |
| O(6)-Zn(2)#4 | 1.943(4) | O(2)-Zn(2)-N(4)#3   | 108.37(19) |
| N(4)-Zn(2)#5 | 2.021(5) | O(2)-Zn(2)-O(9)     | 108.5(2)   |

|                   |          |                     |           |
|-------------------|----------|---------------------|-----------|
| O(8)-Zn(1)#2      | 1.990(4) | O(6)#4-Zn(2)-O(2)   | 97.98(17) |
| O(6)#4-Zn(2)-O(9) | 115.7(2) | O(6)#4-Zn(2)-N(4)#3 | 126.1(2)  |
| O(9)-Zn(2)-N(4)#3 | 99.4(2)  |                     |           |

Symmetrical codes: #1 -x, -y+2, -z+1; #2 -x, -y+1, -z+1; #3 x, y-1, -z; #4 -x+1, -y+1, -z; #5 x, y+1, z.

### Complex 7

|                     |            |                   |           |
|---------------------|------------|-------------------|-----------|
| N(4)-Zn(1)#1        | 2.051(2)   | O(3)#2-Zn(1)-O(4) | 178.50(7) |
| O(3)-Zn(1)#2        | 2.125(2)   | O(6)-Zn(1)-N(4)#1 | 96.89(8)  |
| Zn(1)-N(4)#1        | 2.051(2)   | O(6)-Zn(1)-O(4)   | 82.22(8)  |
| Zn(1)-O(4)          | 2.253(2)   | O(6)-Zn(1)-O(3)#2 | 97.02(8)  |
| Zn(1)-O(3)#2        | 2.125(2)   | O(6)-Zn(1)-O(2)   | 122.46(9) |
| Zn(1)-O(6)          | 2.0067(19) | O(2)-Zn(1)-N(4)#1 | 139.80(9) |
| Zn(1)-O(2)          | 2.023(2)   | O(2)-Zn(1)-O(4)   | 89.31(9)  |
| N(4)#1-Zn(1)-O(4)   | 88.17(9)   | O(2)-Zn(1)-O(3)#2 | 90.02(8)  |
| N(4)#1-Zn(1)-O(3)#2 | 93.20(8)   |                   |           |

Symmetrical codes: #1 -x, -y, -z+1; #2 -x, -y, -z; #3 -x, -y+1, -z-1; #4 -x+1, -y, -z+1.

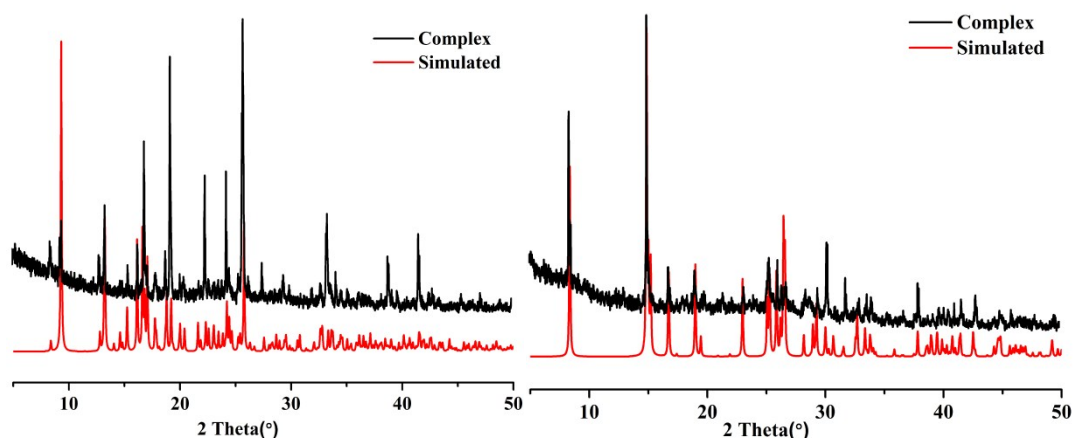

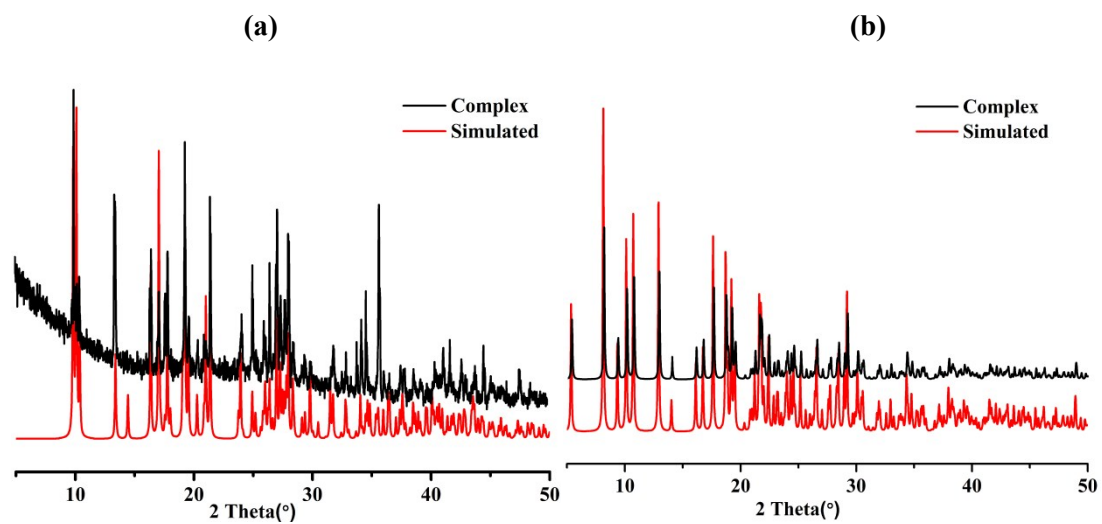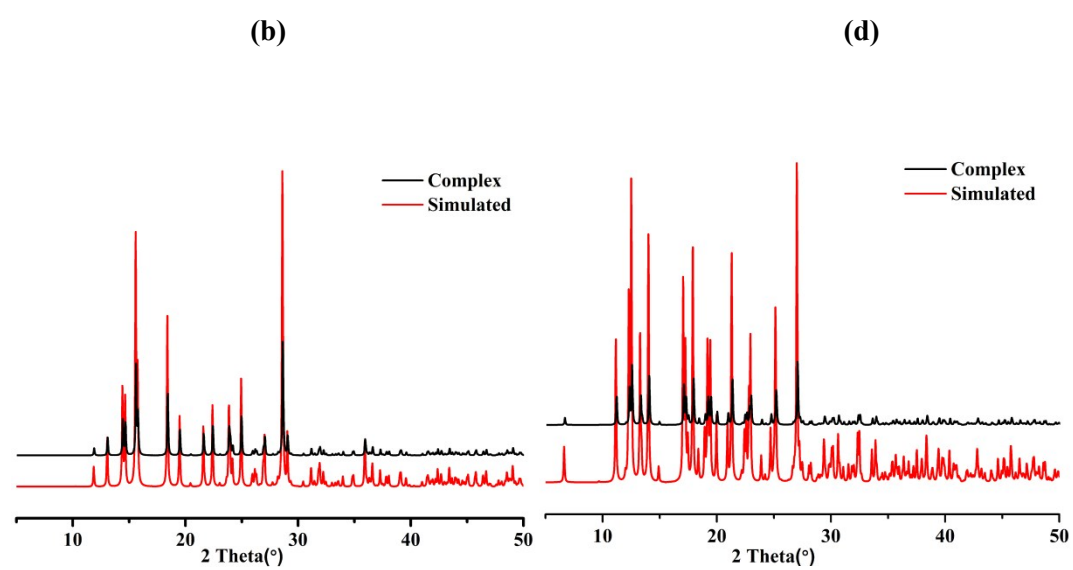

(e) (f)

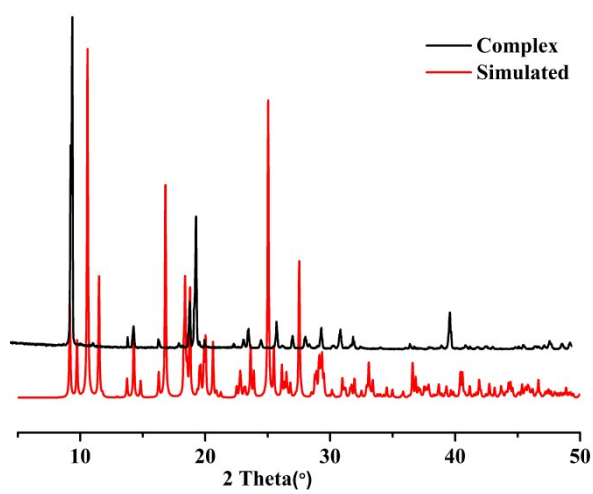

(g)

**Fig. S1** PXRD patterns of **1-7** in (a-g) simulated from the X-ray single-crystal structure and experimental samples.

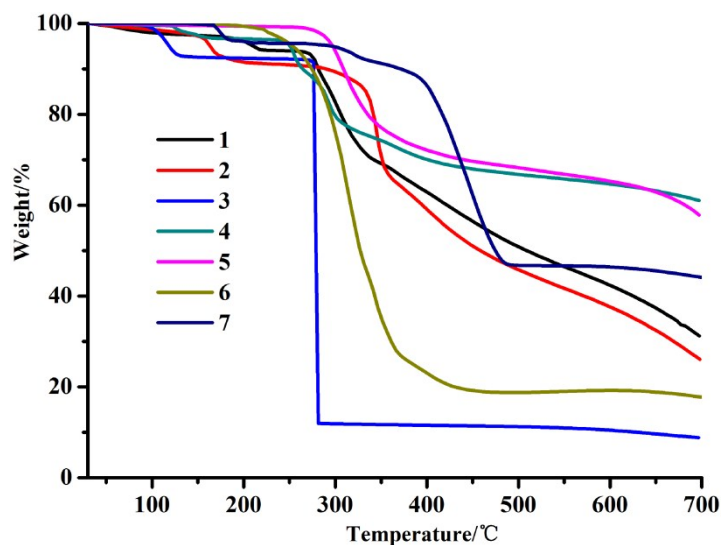

**Fig. S2** TGA plots of complexes **1-7**.

**Table S2.** Standard Deviation ( $\sigma$ ) calculation for the detection of  $\text{CrO}_4^{2-}$  for **2**.

| Test                            | fluorescence intensity (nm) |
|---------------------------------|-----------------------------|
| 1                               | 1214.153                    |
| 2                               | 1213.355                    |
| 3                               | 1212.986                    |
| 4                               | 1214.346                    |
| 5                               | 1213.003                    |
| average                         | 1213.5686                   |
| standard deviation ( $\sigma$ ) | 0.64                        |

**Table S3.** Standard Deviation ( $\sigma$ ) calculation for the detection of  $\text{Cr}_2\text{O}_7^{2-}$  for **2**.

| Test | fluorescence intensity (nm) |
|------|-----------------------------|
| 1    | 1319.053                    |



|                                 |          |
|---------------------------------|----------|
| 2                               | 1318.855 |
| 3                               | 1320.186 |
| 4                               | 1319.146 |
| 5                               | 1318.703 |
| average                         | 1319.188 |
| standard deviation ( $\sigma$ ) | 0.58     |

**Table**

**S4.**

Standard Deviation ( $\sigma$ ) calculation for the detection of  $\text{MnO}_4^-$  for **2**.

| Test                            | fluorescence intensity (nm) |
|---------------------------------|-----------------------------|
| 1                               | 1539.994                    |
| 2                               | 1537.355                    |
| 3                               | 1538.186                    |
| 4                               | 1537.347                    |
| 5                               | 1539.143                    |
| average                         | 1538.405                    |
| standard deviation ( $\sigma$ ) | 1.27                        |

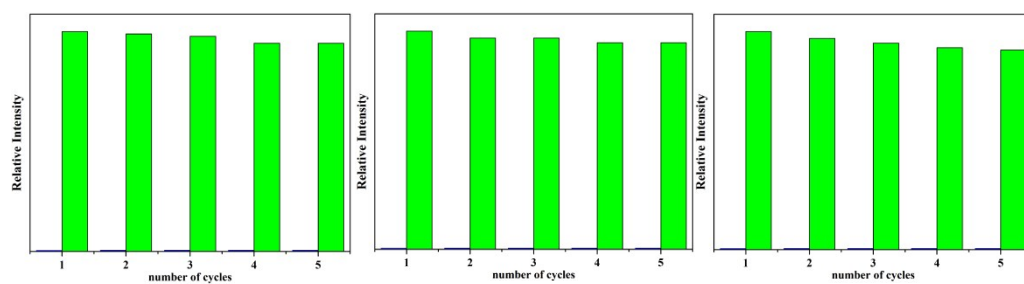

**(a)**

**(b)**

**(c)**

**Fig. S3** Multiple cycles for the luminescence quenching of **2** by  $\text{CrO}_4^-$ ,  $\text{Cr}_2\text{O}_7^{2-}$ ,  $\text{MnO}_4^-$  and recovery after washing by  $\text{H}_2\text{O}$  for several times.

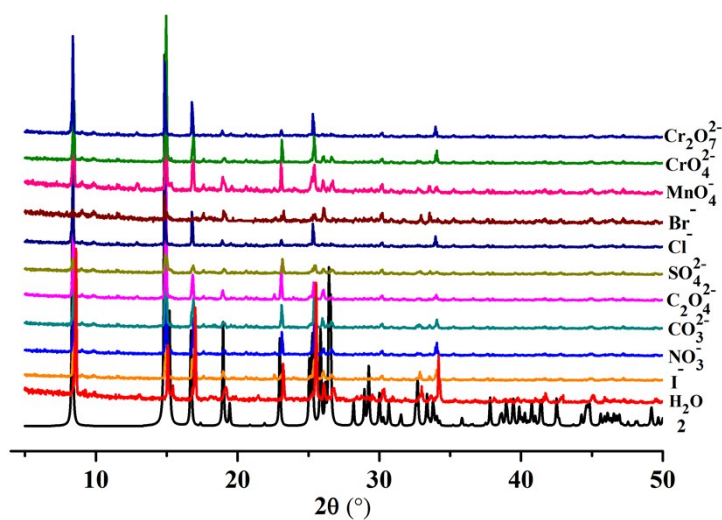

**Fig. S4** PXR D patterns of **2** treated by different  $K_x(\text{anion})$  aqueous solutions. It indicated that **2** retains its framework after immersed in aqueous solution containing different anions.

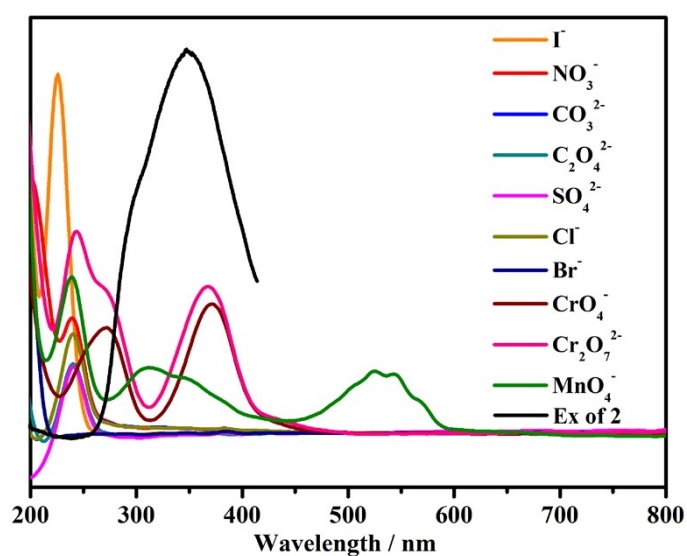

**Fig. S5** UV-Vis adsorption spectra of  $K(\text{anion})_x$  aqueous solutions and the excitation spectrum of **2**.

**Table S5.** A comparison of various fluorescent materials used for detecting  $\text{CrO}_4^{2-}$ ,  $\text{Cr}_2\text{O}_7^{2-}$  and  $\text{MnO}_4^-$ .

| Fluorescent materials                                            | Luminescent substrates | $K_{sv}/M^{-1}$    | detection limit/M     | Ref.      |
|------------------------------------------------------------------|------------------------|--------------------|-----------------------|-----------|
| $[Eu(L)(HCOO)(H_2O)]_n$                                          | $CrO_4^{2-}$           | $1.53 \times 10^3$ | $1.2 \times 10^{-6}$  | 17a       |
| $[Tb(L)(HCOO)(H_2O)]_n$                                          | $CrO_4^{2-}$           | $1.30 \times 10^3$ | $1.8 \times 10^{-6}$  | 17a       |
| $[Zn_2(TPOM)(NDC)_2] \cdot 3.5H_2O$                              | $CrO_4^{2-}$           | $7.81 \times 10^3$ | $2.50 \times 10^{-6}$ | 17b       |
| $[Eu_2(tpbpc)_4 \cdot CO_3 \cdot 4H_2O] \cdot DMF \cdot solvent$ | $CrO_4^{2-}$           | $4.85 \times 10^3$ | $3.30 \times 10^{-7}$ | 19b       |
| <b>Complex 2</b>                                                 | $CrO_4^{2-}$           | $1.1 \times 10^4$  | $1.75 \times 10^{-4}$ | This work |
| $[Eu(L)(HCOO)(H_2O)]_n$                                          | $Cr_2O_7^{2-}$         | 2762.6             | $1.0 \times 10^{-6}$  | 17a       |
| $[Tb(L)(HCOO)(H_2O)]_n$                                          | $Cr_2O_7^{2-}$         | 2133.5             | $2.1 \times 10^{-6}$  | 17a       |
| $[Zn_2(TPOM)(NDC)_2] \cdot 3.5H_2O$                              | $Cr_2O_7^{2-}$         | $9.21 \times 10^3$ | $2.35 \times 10^{-6}$ | 17b       |
| $\{[Zn_3(tza)_2(\mu_2-OH)_2(H_2O)_2] \cdot H_2O\}_n$             | $Cr_2O_7^{2-}$         | $5.02 \times 10^3$ | -                     | 17d       |
| $\{[Cd(L)(BPDC)] \cdot 2H_2O\}_n$                                | $Cr_2O_7^{2-}$         | $6.4 \times 10^3$  | $3.76 \times 10^{-5}$ | 19a       |
| $\{[Cd(L)(SDBA)(H_2O)] \cdot 0.5H_2O\}_n$                        | $Cr_2O_7^{2-}$         | $4.97 \times 10^3$ | $4.86 \times 10^{-5}$ | 19a       |

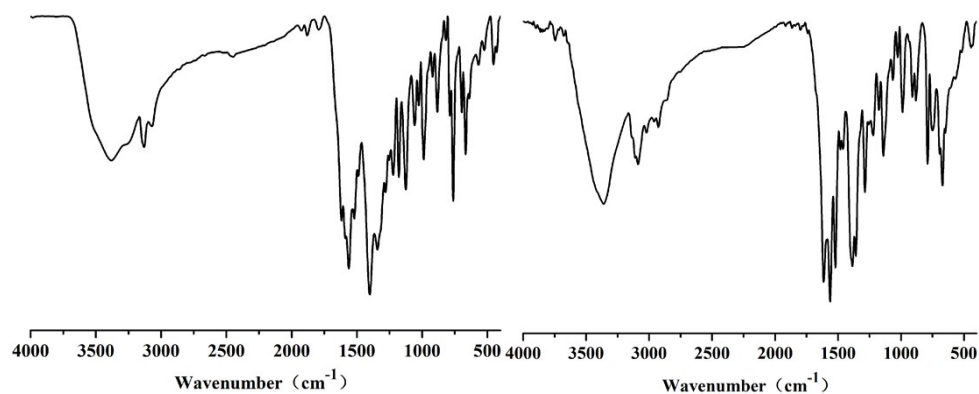

(a)

(b)

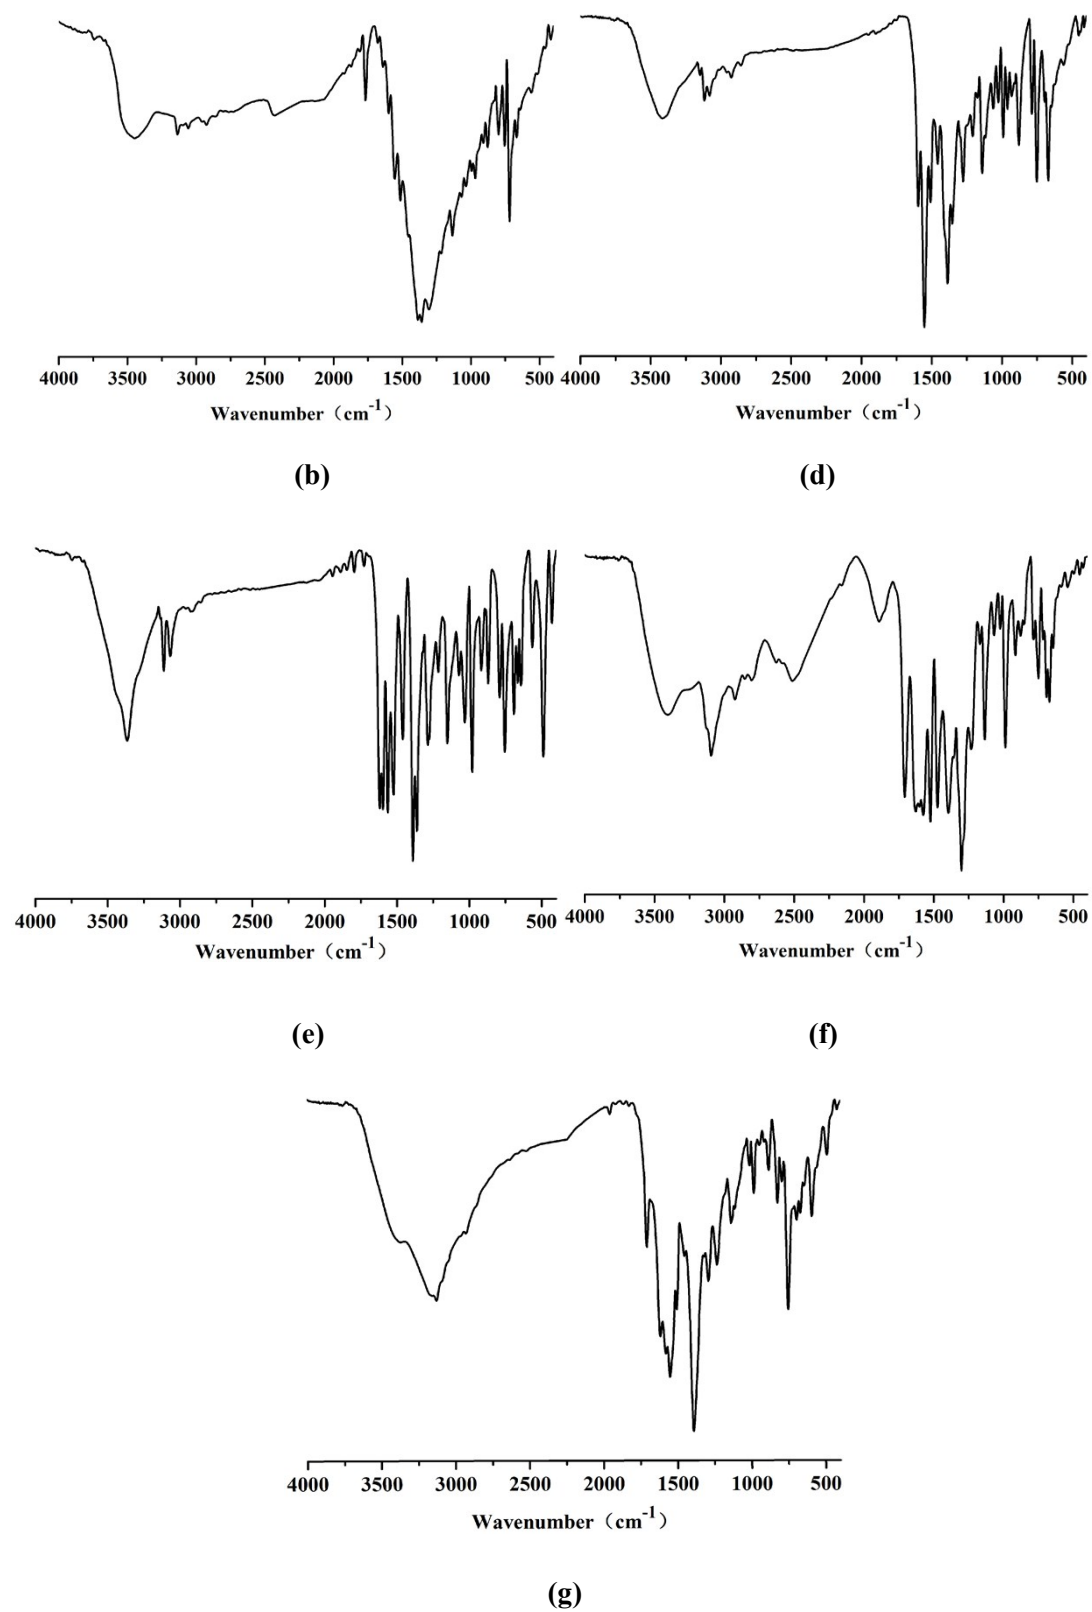

**Fig. S6** IR spectra of the as-synthesized **1-7** in (a-g).
